# Supplementary material for: Strain-dependent effects of clinical echovirus 30 outbreak isolates at the blood-CSF barrier
Source: PubMed Central journal article supplement (PMC5819246; doi:10.1186/s12974-018-1061-4), 2018-02-20
Supplement: 12974_2018_1061_MOESM12_ESM.pdf [file 12974_2018_1061_MOESM12_ESM.pdf]

| #  | Gene       | Position | Aminoacids |       |       |       |
|----|------------|----------|------------|-------|-------|-------|
|    |            |          | E-30 Bast. | 13311 | 13759 | 14197 |
| 1  | <b>VP4</b> | 15       | T          | T     | T     | S     |
| 2  |            | 16       | G          | S     | G     | S     |
| 3  |            | 18       | S          | N     | S     | N     |
| 4  |            | 22       | N          | S     | N     | S     |
| 5  |            | 24       | V          | I     | V     | I     |
| 6  |            | 47       | T          | S     | T     | T     |
| 7  |            | 52       | R          | K     | K     | K     |
| 8  | <b>VP2</b> | 78       | Y          | Y     | F     | Y     |
| 9  |            | 106      | V          | V     | E     | V     |
| 10 |            | 114      | H          | N     | R     | N     |
| 11 |            | 143      | S          | S     | A     | S     |
| 12 |            | 173      | A          | T     | S     | T     |
| 13 |            | 227      | G          | E     | E     | G     |
| 14 |            | 254      | Y          | F     | F     | F     |
| 15 | <b>VP3</b> | 376      | I          | V     | I     | V     |
| 16 |            | 390      | E          | G     | E     | G     |
| 17 |            | 391      | H          | N     | H     | N     |
| 18 |            | 395      | I          | M     | I     | M     |
| 19 |            | 407      | N          | S     | S     | S     |
| 20 |            | 418      | R          | Q     | Q     | Q     |
| 21 |            | 421      | Y          | H     | Y     | H     |
| 22 |            | 427      | H          | H     | R     | H     |
| 23 |            | 462      | I          | I     | M     | I     |
| 24 |            | 463      | A          | T     | A     | A     |
| 25 |            | 513      | A          | A     | A     | V     |
| 26 | <b>VP1</b> | 573      | G          | S     | S     | S     |
| 27 |            | 575      | L          | I     | I     | I     |
| 28 |            | 577      | K          | R     | R     | R     |
| 29 |            | 578      | A          | A     | A     | T     |
| 30 |            | 586      | I          | V     | V     | V     |
| 31 |            | 622      | V          | I     | V     | I     |
| 32 |            | 624      | F          | Y     | Y     | Y     |
| 33 |            | 632      | L          | I     | I     | I     |
| 34 |            | 646      | H          | Q     | Q     | Q     |
| 35 |            | 652      | A          | V     | V     | V     |
| 36 |            | 655      | D          | E     | E     | E     |
| 37 |            | 690      | F          | L     | F     | L     |
| 38 |            | 700      | N          | T     | T     | T     |
| 39 |            | 701      | R          | T     | T     | T     |

|    |           |      |   |   |   |   |
|----|-----------|------|---|---|---|---|
| 40 |           | 713  | I | V | V | V |
| 41 |           | 724  | T | K | R | K |
| 42 |           | 725  | G | S | S | S |
| 43 |           | 798  | G | A | A | A |
| 44 |           | 826  | P | P | P | Q |
| 45 |           | 831  | K | R | K | R |
| 46 |           | 845  | G | D | G | D |
| 47 |           | 857  | V | L | L | L |
| 48 |           | 858  | V | T | L | T |
| 49 |           | 859  | T | N | N | N |
| 50 | <b>2C</b> | 862  | A | V | V | V |
| 51 |           | 864  | E | G | G | G |
| 52 |           | 870  | A | A | V | A |
| 53 |           | 877  | L | V | V | V |
| 54 |           | 886  | T | N | T | N |
| 55 |           | 912  | T | V | T | V |
| 56 |           | 919  | T | S | T | S |
| 57 |           | 935  | T | S | N | S |
| 58 |           | 980  | V | V | A | V |
| 59 | <b>2B</b> | 1013 | K | K | R | K |
| 60 |           | 1043 | I | V | V | V |
| 61 |           | 1057 | V | I | V | I |
| 62 |           | 1065 | I | I | V | I |
| 63 |           | 1074 | I | V | I | V |
| 64 |           | 1083 | I | V | I | V |
| 65 |           | 1087 | T | S | A | S |
| 66 |           | 1095 | H | Q | Q | Q |
| 67 |           | 1097 | V | V | T | V |
| 68 |           | 1104 | P | L | P | P |
| 69 | <b>2A</b> | 1112 | N | G | G | G |
| 70 |           | 1132 | I | N | I | N |
| 71 |           | 1150 | K | R | R | R |
| 72 |           | 1157 | N | T | N | T |
| 73 |           | 1205 | A | T | A | T |
| 74 |           | 1218 | S | S | G | S |
| 75 |           | 1294 | R | K | K | K |
| 76 |           | 1385 | V | V | A | V |
| 77 |           | 1389 | R | K | K | K |
| 78 |           | 1394 | V | V | L | V |
| 79 |           | 1405 | R | K | R | K |
| 80 |           | 1424 | N | N | T | N |

|     |             |      |   |   |   |   |
|-----|-------------|------|---|---|---|---|
| 81  | <b>3A</b>   | 1451 | A | A | T | A |
| 82  |             | 1479 | K | R | K | R |
| 83  |             | 1486 | I | I | V | I |
| 84  | <b>VPg</b>  | 1531 | S | T | T | T |
| 85  |             | 1538 | S | P | P | P |
| 86  | <b>3C</b>   | 1564 | A | S | A | S |
| 87  |             | 1567 | V | V | A | V |
| 88  |             | 1568 | K | K | R | K |
| 89  |             | 1591 | K | R | K | R |
| 90  |             | 1597 | I | L | L | L |
| 91  |             | 1606 | V | L | L | L |
| 92  |             | 1641 | R | K | R | K |
| 93  |             | 1644 | A | V | V | V |
| 94  |             | 1679 | T | T | A | T |
| 95  |             | 1710 | V | I | I | I |
| 96  |             | 1725 | R | K | K | K |
| 97  |             | 1730 | D | D | E | D |
| 98  | <b>RdRp</b> | 1742 | K | K | R | K |
| 99  |             | 1743 | E | D | D | D |
| 100 |             | 1764 | H | Q | Q | Q |
| 101 |             | 1784 | A | V | A | V |
| 102 |             | 1807 | M | M | L | M |
| 103 |             | 1810 | V | V | V | I |
| 104 |             | 1868 | K | K | R | K |
| 105 |             | 1871 | A | T | T | T |
| 106 |             | 1897 | A | V | T | V |
| 107 |             | 1898 | E | D | E | D |
| 108 |             | 1932 | M | L | L | L |
| 109 |             | 1948 | L | L | V | L |
| 110 |             | 1986 | E | E | G | E |
| 111 |             | 1991 | S | S | T | S |
| 112 |             | 1992 | H | H | N | H |
| 113 |             | 2069 | H | W | W | W |
| 114 |             | 2082 | G | G | D | G |
| 115 |             | 2102 | T | A | T | A |
| 116 |             | 2121 | V | V | V | I |
| 117 |             | 2160 | Q | H | H | H |
| 118 |             | 2166 | V | I | I | I |
| 119 |             | 2167 | S | Q | R | Q |
| 120 |             | 2180 | L | L | I | L |
